# Supplementary material for: Towards Multilingual Protocol Generation For Spontaneous Speech Dialogues
Source: MDPI journal article supplement (doi:10.3390/foods11182782), 1998-01-01
Supplement: s1 [file s1]

## Supplementary Information

**Table S1.** Food items in the processed food groups

| Processed food group                | Processed food item                              |
|-------------------------------------|--------------------------------------------------|
| Beverages, excluding dairy products | Bubble tea                                       |
|                                     | Cereal beverage                                  |
|                                     | Soya bean drink                                  |
| Cereals and cereal products         | Bean thread noodles (tang hoon)                  |
|                                     | Buckwheat noodles (soba, naengmyeon)             |
|                                     | Cereal & Grain flour                             |
|                                     | Cereal Groats And Meal                           |
|                                     | Coconut Flour                                    |
|                                     | Dried Rice Cake                                  |
|                                     | Dry instant noodles                              |
|                                     | Egg Tofu                                         |
|                                     | Gluten                                           |
|                                     | Glutinous Rice Flour                             |
|                                     | Instant noodles with soup                        |
|                                     | Maize Flour                                      |
|                                     | Maize starch                                     |
|                                     | Mock Meat                                        |
|                                     | Oat cracker snacks                               |
|                                     | Other cereal based snack Unspecified             |
|                                     | Other Flour Unspecified                          |
|                                     | Other noodles Unspecified                        |
|                                     | Other rice products Unspecified                  |
|                                     | Other starch Unspecified                         |
|                                     | Plant and Bean Based Meal Cereal                 |
|                                     | Popcorn                                          |
|                                     | Potato starch                                    |
|                                     | Processed cereal grain                           |
|                                     | Rice dumpling                                    |
|                                     | Rice Flour                                       |
|                                     | Rice noodles (pho noodles, hor fun)              |
|                                     | Rice puff                                        |
|                                     | Roasted Malt                                     |
|                                     | Root and tuber flour                             |
|                                     | Tapioca starch                                   |
|                                     | Vermicelli                                       |
|                                     | Wheat noodles (udon, somen, la mian)             |
|                                     | Wheat starch                                     |
|                                     | Yellow and egg noodles (ramen, you mian)         |
| Confectionery and sweeteners        | Cocoa Paste                                      |
|                                     | Cocoa Powder                                     |
|                                     | Fruit jelly                                      |
|                                     | Hard candy (including lollipop)                  |
|                                     | Honey                                            |
|                                     | Instant Pudding with and without Fruits (Jell-O) |
|                                     | Nougat                                           |
|                                     | Preserved Nata De Coco                           |

|                  |                                                            |
|------------------|------------------------------------------------------------|
|                  | Sugar Syrup                                                |
|                  | Dairy Cream                                                |
|                  | Buttermilk                                                 |
| Dairy products   | Fermented milk drink                                       |
|                  | Non-Dairy Cream                                            |
|                  | Yogurt                                                     |
|                  | Canned bivalvia (Shell fish)                               |
|                  | Canned cephalopods (Squid, octopus, cuttlefish)            |
|                  | Canned crab                                                |
|                  | Canned fish                                                |
|                  | Canned lobster                                             |
|                  | Canned prawn/shrimp                                        |
|                  | Crab balls                                                 |
|                  | Crab cake                                                  |
|                  | Crab nuggets                                               |
|                  | Crab paste                                                 |
|                  | Crab Pate/burger                                           |
|                  | Dried Fish                                                 |
|                  | Fish balls                                                 |
|                  | Fish cake                                                  |
|                  | Fish floss                                                 |
|                  | Fish nuggets                                               |
|                  | Fish paste                                                 |
|                  | Fish pate/burger                                           |
|                  | Fish sausage/ hotdog / cocktail                            |
|                  | Imitation abalone                                          |
|                  | Imitation crabstick                                        |
|                  | Lobster balls                                              |
|                  | Lobster cake                                               |
| Fish and seafood | Lobster paste                                              |
|                  | Lobster pate/burger                                        |
|                  | Other dried seafood and other related products Unspecified |
|                  | Other dried seafood snack Unspecified                      |
|                  | Other imitation Seafood Unspecified                        |
|                  | Other salted seafood and related products Unspecified      |
|                  | Other seafood cake and related products Unspecified        |
|                  | Other seafood canned and related products Unspecified      |
|                  | Other seafood preserved and related products Unspecified   |
|                  | Other seafood smoked and related products Unspecified      |
|                  | Prawn/shrimp balls                                         |
|                  | Prawn/shrimp cake                                          |
|                  | Prawn/shrimp nuggets                                       |
|                  | Prawn/shrimp paste                                         |
|                  | Prawn/shrimp Pate/burger                                   |
|                  | Preserved bivalvia (Shell fish)                            |
|                  | Preserved cephalopods (Squid, octopus, cuttlefish)         |
|                  | Preserved crab                                             |
|                  | Preserved echinoderms (Sea urchins, sea cucumber)          |
|                  | Preserved fish                                             |
|                  | Preserved prawn/shrimp                                     |
|                  | Salted fish                                                |
|                  | Smoked bivalvia (Shell fish)                               |
|                  | Smoked cephalopods (Squid, octopus, cuttlefish)            |

|  |                                                |
|--|------------------------------------------------|
|  | Smoked crab                                    |
|  | Smoked echinoderms (Sea urchins, sea cucumber) |
|  | Smoked fish                                    |
|  | Smoked gastropods (Escargot)                   |
|  | Smoked lobster                                 |
|  | Smoked prawn/shrimp                            |
|  | Squid balls                                    |
|  | Squid paste                                    |
|  | Apple Paste and puree                          |
|  | Apricot Paste                                  |
|  | Citrus Fruit Paste                             |
|  | Coconut Milk                                   |
|  | Coconut Paste and puree                        |
|  | Dried banana                                   |
|  | Dried berries                                  |
|  | Dried tangerine                                |
|  | Fruit jam/marmalade                            |
|  | Fruit Pastes and puree with Mixed Fruit        |
|  | Fruit Pastes Berry Fruit                       |
|  | Orange Puree                                   |
|  | Other Coconut products Unspecified             |
|  | Other dried fruit Unspecified                  |
|  | Other fruit paste and puree Unspecified        |
|  | Other pickled fruit Unspecified                |
|  | Other Preserved Fruit Unspecified              |
|  | Other salted fruit Unspecified                 |
|  | Other sugared fruit Unspecified                |
|  | Pickled Apple                                  |
|  | Pickled Mixed Fruit                            |
|  | Pickled Tamarind                               |
|  | Plum Paste                                     |
|  | Salted Olive                                   |
|  | Salted Plum                                    |
|  | Salted Prune                                   |
|  | Sugared Apricot                                |
|  | Sugared Arbutus (E.g. Yang mei)                |
|  | Sugared Banana                                 |
|  | Sugared berries                                |
|  | Sugared Citrus Peel                            |
|  | Sugared Tangerine                              |
|  | Beef Bacon                                     |
|  | Beef Ham and Bologna                           |
|  | Beef Luncheon Meat                             |
|  | Beef Meat ball                                 |
|  | Beef Pate/Burger                               |
|  | Beef Satay                                     |
|  | Beef Sausage/hot dog/cocktail                  |
|  | Canned Beef                                    |
|  | Canned Chicken                                 |
|  | Canned Duck                                    |
|  | Canned Mutton                                  |
|  | Canned Pork                                    |

Fruits

Meat and meat products

|                       |                                                                                                                                                                                                                                                                                                                                                                                                                                                                                                                                                                                                                                                      |
|-----------------------|------------------------------------------------------------------------------------------------------------------------------------------------------------------------------------------------------------------------------------------------------------------------------------------------------------------------------------------------------------------------------------------------------------------------------------------------------------------------------------------------------------------------------------------------------------------------------------------------------------------------------------------------------|
|                       | Chicken Bacon<br>Chicken Ham and Bologna<br>Chicken Luncheon Meat<br>Chicken Meat ball<br>Chicken Nuggets<br>Chicken Pate/Burger<br>Chicken Satay<br>Chicken Sausage/hot dog/cocktail<br>Cured Chicken<br>Duck Ham and Bologna<br>Duck Sausage/hot dog/cocktail<br>Meat floss<br>Mutton Pate/Burger<br>Mutton Satay<br>Pork Bacon<br>Pork Ham and Bologna<br>Pork Luncheon Meat<br>Pork Meat ball<br>Pork Pate/Burger<br>Pork Satay<br>Pork Sausage/hot dog/cocktail<br>Processed exotic animal product<br>Smoked Beef<br>Smoked Chicken<br>Smoked Duck<br>Smoked Pork<br>Smoked Turkey<br>Turkey Ham and Bologna<br>Turkey Sausage/hot dog/cocktail |
| Nuts and seeds        | Dried Tree Nuts<br>Nut and seed puree and spread<br>Other Tree Nuts Unspecified<br>Preserved Tree Nuts<br>Roasted Nuts Snack<br>Sugared Tree Nuts                                                                                                                                                                                                                                                                                                                                                                                                                                                                                                    |
| Sauces and condiments | Barbeque Sauce<br>Honey mustard<br>Mayonnaise<br>Other Dipping Sauces Unspecified does not include tomato<br>Thousand island sauce                                                                                                                                                                                                                                                                                                                                                                                                                                                                                                                   |
| Seaweed and fungi     | Dried Jew Ear<br>Dried Mushroom<br>Dried Seaweed<br>Other Fungi Unspecified<br>Other Seaweed Unspecified<br>Pickled Mushroom<br>Processed Seaweed                                                                                                                                                                                                                                                                                                                                                                                                                                                                                                    |
| Soups                 | Canned Soup/Broth<br>Instant Soup Powder<br>Meat Extract Broth/soup<br>Packet broth and soup                                                                                                                                                                                                                                                                                                                                                                                                                                                                                                                                                         |
| Vegetables            | Dried bean                                                                                                                                                                                                                                                                                                                                                                                                                                                                                                                                                                                                                                           |

---

Dried Honey Tomato (not cherry tomato)  
Other dried vegetable Unspecified  
Other pickled vegetable Unspecified  
Other salted vegetables Unspecified  
Other sugared vegetables Unspecified  
Other vegetable puree Unspecified  
Pickled Asparagus  
Pickled Bamboo shoot  
Pickled bean  
Pickled Ginger  
Pickled Mixed Vegetable  
Pickled Onion  
Pickled tomato  
Salted beans vegetables (black bean)  
Salted Cabbage  
Salted Potato  
Salted Sweet Corn  
Sugared Gourds And Melon (melon peel)  
Sugared sweet corn  
Tomato Puree

---
